# Supplementary material for: Analysis of phthalic, isophthalic and long-chain (C4–C12) dicarboxylic acids in atmospheric aerosols by UPLC/ESI/ToF-MS
Source: Royal Society of Chemistry journal article supplement (doi:10.1039/c0ay00677g), 2011-01-01
Supplement: c0ay00677g.pdf [file c0ay00677g.pdf]

ESI Table S1. Two-level fractional factorial design for the determination of significant variables for the extraction of DCAs by ASE

| Levels | Factors          |                  |                  |                  |                  |
|--------|------------------|------------------|------------------|------------------|------------------|
|        | (1) <sup>a</sup> | (2) <sup>b</sup> | (3) <sup>c</sup> | (4) <sup>d</sup> | (5) <sup>e</sup> |
| -1     | 100              | 1000             | 1                | 60               | 40               |
| +1     | 150              | 3000             | 8                | 100              | 300              |

  

| Run number |   |   |   |   |   | Experimental response <sup>f</sup> |
|------------|---|---|---|---|---|------------------------------------|
| 1          | - | - | - | - | + | 96%                                |
| 2          | + | - | - | - | - | 99%                                |
| 3          | - | + | - | - | - | 96%                                |
| 4          | + | + | - | - | + | 107%                               |
| 5          | - | - | + | - | - | 101%                               |
| 6          | + | - | + | - | + | 104%                               |
| 7          | - | + | + | - | + | 102%                               |
| 8          | + | + | + | - | - | 117%                               |
| 9          | - | - | - | + | - | 103%                               |
| 10         | + | - | - | + | + | 108%                               |
| 11         | - | + | - | + | + | 102%                               |
| 12         | + | + | - | + | - | 107%                               |
| 13         | - | - | + | + | + | 100%                               |
| 14         | + | - | + | + | - | 105%                               |
| 15         | - | + | + | + | - | 103%                               |
| 16         | + | + | + | + | + | 109%                               |

<sup>a</sup>temperature in °C; <sup>b</sup>pressure in psi; <sup>c</sup>static extraction time in minutes; <sup>d</sup>flush volume in %; <sup>e</sup>purge time in seconds; <sup>f</sup>mean recovery of 9 selected target compounds (see text)

ESI Table S2. Recovery of DCAs

| Analyte (abbreviation)                        | Spiked mean<br>( $\mu\text{g}$ ) | Found mean<br>( $\mu\text{g}$ ) | Recovery mean<br>(%) | RSD (%; n=6) |
|-----------------------------------------------|----------------------------------|---------------------------------|----------------------|--------------|
| Cis butenedioic acid (cisC <sub>4</sub> )     | 0.805                            | 0.951                           | 118                  | 11.4         |
| Trans butenedioic acid (transC <sub>4</sub> ) | 0.582                            | 0.711                           | 122                  | 3.2          |
| Butanedioic acid (C <sub>4</sub> )            | 0.681                            | 0.797                           | 117                  | 12.2         |
| Methylpropanedioic acid (iC <sub>4</sub> )    | 0.471                            | n.d.                            |                      |              |
| Pentanedioic acid (C <sub>5</sub> )           | 0.495                            | 0.526                           | 106                  | 18.0         |
| Methylbutanedioic acid (iC <sub>5</sub> )     | 0.681                            | 0.669                           | 98                   | 12.9         |
| Hexanedioic acid (C <sub>6</sub> )            | 0.322                            | 0.301                           | 94                   | 9.1          |
| 2-Methylpentanedioic acid (iC <sub>6</sub> )  | 0.396                            | 0.391                           | 99                   | 3.8          |
| Phthalic acid (Ph)                            | 0.533                            | 0.468                           | 88                   | 9.3          |
| Heptanedioic acid (C <sub>7</sub> )           | 0.533                            | 0.459                           | 86                   | 4.7          |
| Isophthalic acid (iPh)                        | 0.421                            | 0.417                           | 99                   | 8.9          |
| Octanedioic acid (C <sub>8</sub> )            | 0.235                            | 0.201                           | 85                   | 10.2         |
| Nonanedioic acid (C <sub>9</sub> )            | 0.272                            | 0.256                           | 94                   | 6.9          |
| Decanedioic acid (C <sub>10</sub> )           | 0.198                            | 0.147                           | 74                   | 9.5          |
| Undecanedioic acid (C <sub>11</sub> )         | 0.186                            | 0.151                           | 81                   | 6.0          |

n.d.: not detected (below LOD)
